# Human hippocampal ripples signal encoding of episodic memories

John J. Sakon<sup>1</sup>, David J. Halpern<sup>1</sup>, Daniel R. Schonhaut<sup>2</sup>, Michael J. Kahana,<sup>1\*</sup>

<sup>1</sup>Department of Psychology, University of Pennsylvania, Philadelphia, PA, 19104, USA

<sup>2</sup>Department of Neuroscience, Perelman School of Medicine at the University of Pennsylvania  
Philadelphia, PA, 19104, USA

\*To whom correspondence should be addressed: kahana@psych.upenn.edu

December 7, 2022

**Keywords:** ripples, episodic memory, hippocampus, contextual reinstatement, medial temporal lobe, encoding, subsequent clustering effect

## Abstract

Recent human electrophysiology work has uncovered the presence of high frequency oscillatory events, termed ripples, during awake behavior. This prior work focuses on ripples in the medial temporal lobe (MTL) during memory retrieval. Few studies, however, investigate ripples during item encoding. Many studies have found neural activity during encoding that predicts later recall, termed subsequent memory effects (SMEs), but it is unclear if ripples during encoding also predict subsequent recall. Detecting ripples in 124 neurosurgical participants performing an episodic memory task, we find insignificant ripple SMEs in any MTL region, even as these regions exhibit robust high frequency activity (HFA) SMEs. Instead, hippocampal ripples increase during encoding of items leading to

18 **recall of temporally or semantically associated items, a phenomenon known as clustering.**  
19 **This subsequent clustering effect (SCE) arises specifically when hippocampal ripples oc-**  
20 **cur during both encoding and retrieval, suggesting that ripples mediate the encoding and**  
21 **future reinstatement of episodic memories.**

## 22 **Introduction**

23 Decades of work in animal models have identified discrete, high frequency events in MTL,  
24 termed ripples (1). This animal work has suggested a specific role for hippocampal ripples in  
25 memory formation during learning and offline replay (1) and more recently memory retrieval  
26 (2). A series of recent studies have investigated ripples in human intracranial recordings (see  
27 Liu *et al.* (2022) for a review). Many of these investigations relate medial temporal lobe (MTL)  
28 ripples and memory retrieval, with ripple rate increasing just before participants vocalize recalls  
29 (3–10). The few studies that have reported ripple rates during memory encoding, however, find  
30 conflicting evidence regarding their relation to subsequent recall. One study finds an increase in  
31 ripple rates for subsequently recalled items 0.7–1.5 s into item presentation (6), while the other  
32 finds ripple increases only after item presentation (4).

33 A separate but related body of research has shown that  $\geq 60$  Hz spectral power (often termed  
34 high frequency activity [HFA] or fast-gamma oscillations) predicts subsequent recall (11–14).  
35 Indeed, numerous intracranial studies using HFA detectors distinguish subsequently recalled  
36 and not-recalled items, termed a subsequent memory effect (SME) (6, 15, 16). The overlapping  
37 frequency ranges used to detect HFA and ripples raise questions about whether and how these  
38 signals may be related to one another (17).

39 Recent human intracranial studies find hippocampal ripples preferentially occur during re-  
40 call of episodic memories (5, 7). In particular, Sakon & Kahana (2022) demonstrate that hip-  
41 pocampal ripples signal reinstatement of context during memory retrieval, a mechanism consid-

42 ered crucial to the "jump back in time" phenomenology of episodic memory (18). Meanwhile,  
43 theories of ripple function suggest memory formation and memory retrieval share mechanisms,  
44 as neural activity reinstated during memory retrieval overlaps with activity repeatedly reinstated  
45 during consolidation (2, 9). Considering these two ideas, do ripples also reflect context rein-  
46 statement during the formation of episodic memories? For example, if you attend a Philadel-  
47 phia Phillies game and enjoy a cheesesteak, future cheesesteak orders may retrieve the context  
48 of the event, which will lead to reinstatement of memories clustered with the game (19). We  
49 hypothesize that during the formation of the memory, hippocampal ripples signal engagement  
50 of episodic memory mechanisms, which strengthen the association between the item (cheeses-  
51 teak) and context (Phillies game). This association subsequently increases the likelihood of  
52 reinstating the context of the game when later cued by cheesesteak. Previous work has shown  
53 evidence of this phenomenon, termed a subsequent clustering effect (SCE), using HFA in hip-  
54 pocampus (20), hinting that ripples may underlie subsequent clustering.

55 Analyzing intracranial EEG recordings of 124 participants performing a delayed free re-  
56 call task, we ask if ripples show an SME or SCE in the hippocampus and surrounding cortical  
57 regions in MTL. We partitioned our data into two parts: an initial ~35% of participants for  
58 developing initial hypotheses and analyses, and a second part held out so that we could confirm  
59 our findings with the whole dataset. We pre-registered the initial hypotheses and figures sup-  
60 porting them on the Open Science Framework (<https://osf.io/e98qp>). Therefore, we defined the  
61 analysis parameters for our figures in the pre-registration based on the first part of the dataset,  
62 and here we present figures and statistics on the full dataset (*Methods*).

63 The analyses build the case that hippocampal ripples specifically signal the formation of  
64 episodic memories. First, we do not find a significant ripple SME throughout any MTL regions  
65 despite replicating an SME for HFA. However, when partitioning words into those that lead to  
66 subsequent clustering of recalls vs. those that do not, we find a significant ripple subsequent

67 clustering effect (SCE) specifically in the hippocampus. Evidencing its role in task perfor-  
68 mance, participants with a stronger hippocampal ripple SCE exhibit increased clustering and  
69 superior memory. Finally, we show that hippocampal ripples during memory formation lead to  
70 subsequent clustering precisely when ripples also occur prior to word recall, implying the SCE  
71 incites ripple-mediated reinstatement.

## 72 **Results**

### 73 **Hippocampal ripples do not exhibit a subsequent memory effect (SME).**

74 To clarify the relation between ripples and memory encoding we align hippocampal record-  
75 ings (**Fig. 1e**) to the onset of word presentation during the study phase of a categorized, delayed  
76 free recall task (**Fig. 1b**), in which participants view a list of words and subsequently recall as  
77 many as possible after a distractor period. We use an algorithm recently shown to isolate ripples  
78 in human hippocampus and surrounding MTL during both memory encoding and retrieval (3, 4)  
79 (*Methods*). A raster of ripples from five sample participants illustrates an encoding-related rise  
80 in ripples occurring  $\sim 0.5$  seconds after word onset (each row in **Fig. 2a** represents a word pre-  
81 sentation recorded on a single channel, and each dot represents the start time of a single ripple).  
82 These findings accord with prior work where hippocampal ripple onset occurs hundreds of ms  
83 after presentation of face or place stimuli (4, 6, 7).

84 First, we ask if ripples show an SME. For both hippocampal subfields CA1 (163 sessions  
85 from 86 participants) and CA3/dentate gyrus (CA3/DG: 117 from 59) we average across partic-  
86 ipants to create peri-stimulus time histograms (PSTHs) for both subsequently recalled and not  
87 recalled words. We find only a modest difference in ripple rates between these groups beginning  
88  $\sim 0.5$  seconds after word presentation in both regions (**Fig. 2b**). Although the dataset is ade-  
89 quately powered to find a ripple SME in each region (power  $> 0.97$  using effect sizes for SMEs  
90 reported using HFA (20) and ripple (6) detectors, *Methods*), we find no significant difference in

91 between ripple rates during word presentation of subsequently recalled vs. not recalled words  
92 for CA1 and CA3/DG (**Fig. 2b; Eq. 2**). Meanwhile, amygdala (AMY; 104 sessions from 50  
93 participants) and entorhinal/parahippocampal cortex (ENTPHC, 96 from 52) show lower ripple  
94 rates than hippocampus overall and also fail to show a ripple SME (**Fig. 2b**).

95 Considering that previous studies find strong HFA SMEs in the hippocampus and neighbor-  
96 ing MTL subregions (15) we apply a high frequency activity (HFA) detector on the same trials  
97 as in the ripple analysis reported above. Measuring HFA in a frequency range almost com-  
98 pletely overlapping that of our ripple detector, we find a clear HFA SME in all MTL subregions  
99 (**Fig. 2c**). Using the same linear mixed effects model as with ripples, the HFA SME is signif-  
100 icant for CA1, CA3/DG, AMY, and ENTPHC (**Fig. 2c; Eq. 1**). Notably, when assessing the  
101 ripple SME with this model using a smaller time window that matches the significant range for  
102 the HFA SME (0.4-1.1 s), all four regions fail to show a significant ripple SME ( $P > 0.22$ , each  
103 FDR-corrected across 4 tests of Eq. 2). In sum, HFA exhibits an SME across the MTL, while  
104 the ripple detector does not for any MTL region, likely owing to the extra processing steps in  
105 the ripple detection algorithm (Discussion).

#### 106 **Hippocampal ripples exhibit a subsequent clustering effect (SCE).**

107 The SME contrast fails to take advantage of the rich behavioral structure of the categorized  
108 free recall task (**Fig. 1b-c**). Specifically, the order in which people free recall recently studied  
109 items reveals information about the organization of memory. When participants strongly bind  
110 items to their encoding context, which includes both temporal and semantic information (21),  
111 they tend to retrieve clusters of temporally and semantically similar items (22,23). Our previous  
112 work showed an increase in hippocampal ripples just prior to participants recalling a cluster  
113 of related words, suggesting that ripples signal the reinstatement of context (3). Here, we  
114 hypothesize that ripples might also signal contextual reinstatement during encoding. If this is  
115 true, an increase in ripples during initial presentation of a word would predict that word will

116 subsequently lead to clustering during retrieval (**Fig. 3a**). We refer to this phenomenon as a  
117 subsequent clustering effect (SCE) (20).

118 In categorized free recall, transitions between clustered recalls neatly divide into a handful  
119 of groups (**Fig 1c**). Referring to the example words in **Fig 1c**: **adjacent semantic** indicates two  
120 words from the same categorical pair recalled consecutively, e.g. dolphin and octopus (20% of  
121 recalls); **remote semantic** indicates two words from the same category but not the same pair  
122 recalled consecutively, e.g. dolphin and fish (20% of recalls); **remote unclustered** indicates  
123 two words from different categories that are not presented back-to-back recalled consecutively,  
124 e.g. dolphin and pliers (17% of recalls); and **dead end** indicates the last recall from each list,  
125 which therefore does not transition to another recall (26% of recalls). Adjacent unclustered,  
126 in which participants recall words that appear back-to-back from different categories, is rare  
127 (3%) so we do not analyze this type further, while the remaining recalls are incorrect or repeats  
128 (14%). We then measure ripples during the presentation of the first word in each subsequent  
129 transition (except for dead ends, where there is no transition) and average within each group to  
130 find the ripple rate.

131 Measuring the average ripple rates between these behaviorally-defined groups reveals clear  
132 evidence that hippocampal ripples exhibit an SCE. In particular, testing the ripple rates of  
133 words that lead to subsequent clustering (adjacent semantic and remote semantic) vs. those  
134 that are subsequently recalled but do not lead to clustering (remote unclustered and dead ends)  
135 yields a significant difference in both CA1 and CA3/DG (**Fig 3b, Eq. 2**). When grouping  
136 non-hippocampal MTL (non-HPC MTL) regions (including AMY, ENT, PHC, and perirhinal  
137 cortex) we do not find a significant difference. When making comparisons between the indi-  
138 vidual categories in the clustering group (i.e. adjacent semantic and remote semantic), each of  
139 these also show significantly more ripples during their presentation compared to unclustered  
140 recalls for both CA1 and CA3/DG ( $p < 0.02$ , FDR-corrected, **Eq. 2**) but not non-HPC MTL

141 ( $p > 0.19$ , FDR-corrected, **Eq. 2**). Using a linear mixed effects model to directly compare each  
142 hippocampal subfield with the non-HPC MTL group to account for differences both within and  
143 between participants, we find a significant interaction between region and clustering that pre-  
144 dicts higher ripple rates in each hippocampal region compared to non-HPC MTL **Fig. 3b; Eq.**  
145 **3**.

146 The previous contrasts isolate clustering as we compare words that subsequently lead to  
147 clustering vs. those words that are still recalled but do not lead to the subsequent semantic  
148 or temporal transitions that are hallmarks of context reinstatement. In a similar manner, we  
149 can isolate the SME by contrasting those words that are recalled and do not lead to clustering  
150 vs. words that are not recalled. Using this contrast, we find no evidence of an SME in CA1,  
151 CA3/DG, or non-HPC MTL (**Fig. 3c, Eq. 2**). Further, when making comparisons between the  
152 individual categories in the remembered but not clustered group (i.e. remote semantic and dead  
153 ends) vs. words not recalled, each of these also show no difference in ripples rates for CA1,  
154 CA3/DG, and non-HPC MTL ( $p > 0.33$ , FDR-corrected, **Eq. 2**).

155 Finally, we can directly compare the SCE and SME in the same model, thereby assessing  
156 if the significance of the ripple rise for subsequently clustered words exists after taking into ac-  
157 count ripple rates during the encoding of words that are recalled but not clustered. For both CA1  
158 and CA3/DG, we find a significant factor for the SCE ( $p < 0.004$ , **Eq. 4**, FDR-corrected across  
159 two tests), but not for the SME ( $p > 0.08$ , **Eq. 4**, FDR-corrected across two tests), suggesting the  
160 presence of hippocampal ripples during encoding more strongly predicts subsequent clustering  
161 than subsequent memory.

### 162 **The hippocampal ripple SCE is associated with better memory and increased clustering.**

163 Next, we ask if the ripple SCE correlates with participant behavior. First, measuring the  
164 SCE for each individual participant as the difference in ripples during words that lead to subse-  
165 quent clustering vs. words that are remembered but do not lead to clustering, we compare this

166 change to the average number of recalls for that person per list. Participants that recall more  
167 words display a significantly larger ripple SCE in CA1 and CA3/DG but not in non-HPC MTL  
168 (**Fig. 4a, Eq. 5**). When directly comparing proportion of words recalled vs. SCE between  
169 hippocampus and non-HPC MTL in a single model, both CA1 and CA3/DG show a signifi-  
170 cant interaction between region and recall that predicts SCE (**Fig. 4a, Eq. 6**). Therefore, the  
171 hippocampal ripple SCE in particular predicts superior memory across participants.

172 We next ask whether participants who show a larger ripple SCE also exhibit greater cluster-  
173 ing. Indeed, we find a significant correlation between SCE and proportion of recalls that lead  
174 to subsequent clustering for CA1 (**Fig. 4b, Eq. 7**). CA3/DG and non-HPC MTL do not show a  
175 significant difference. When comparing hippocampus directly with non-HPC MTL in a single  
176 model, CA1 (but not CA3/DG) shows a significantly greater interaction between region and  
177 clustering that predicts SCE (**Fig. 4b, Eq. 8**), indicating the hippocampal SCE also predicts  
178 participant clustering.

179 **Hippocampal ripples during both the first and second pair of words from a category lead**  
180 **to improved recall of the second pair.**

181 On each list in the free recall task two pairs of words from the same semantic category  
182 appear: one in the first half of the list and another in the second half (with the constraint that  
183 pairs from the same category are never shown back-to-back) (**Fig. 1b**). This task structure  
184 allows us to investigate if ripples occurring as participants encode the first pair of words from  
185 a given category ( $X_{1-2}$ ) influence memory for the second pair ( $X_{3-4}$ ) despite the intervening  
186 word presentations. Considering the SCE results (**Fig. 3**), in which increased ripples during  
187 word presentation predict the word will subsequently lead to context reinstatement (and there-  
188 fore clustering) during the retrieval period, we hypothesize that ripples during  $X_{1-2}$  might also  
189 lead to context reinstatement during the presentation of words  $X_{3-4}$ . And if such context re-  
190 instatement manifests during the presentation of words  $X_{3-4}$ , we anticipate likelier subsequent



191 recall of these words (**Fig. 5a**).

192 To test this hypothesis, we measure the accuracy of  $X_{3-4}$  words from each category on each  
193 list after assigning the category to one of four pools: 1) those where  $\geq 1$  ripple occurs during  
194 the presentation of  $X_{1-2}$  (but not  $X_{3-4}$ ), 2) those where  $\geq 1$  ripple occurs during  $X_{3-4}$  (but  
195 not  $X_{1-2}$ ), 3) those where  $\geq 1$  ripple occurs during both  $X_{1-2}$  and  $X_{3-4}$ , and 4) those where no  
196 ripple occurs during either. Averaging within each pool, we find words with a ripple during both  
197  $X_{1-2}$  and  $X_{3-4}$  exhibit the highest recall accuracy, followed by lists with ripples only during  
198  $X_{1-2}$  (**Fig. 5b**).

199 To evaluate differences in the accuracy of  $X_{3-4}$  recall among the pools, we create a linear  
200 mixed model that takes into account  $\geq 1$  ripple during presentation of  $X_{1-2}$ ,  $\geq 1$  ripple during  
201 presentation of  $X_{3-4}$ , the interaction of a ripple occurring for both pairs, and also the ripple  
202 rate for the remaining (eight) words on the list to remove possible list-level ripple rate effects  
203 (**Eq. 9**). This model reveals that CA1 ripples during  $X_{1-2}$  predict  $X_{3-4}$  recall, but *only* if a  
204 ripple also occurs during  $X_{3-4}$  (**Fig. 5b**). Thus, if a ripple occurs during both pairs of words  
205 from a category, the likelihood of recalling the 2nd pair ( $X_{3-4}$ ) increases. However, if a CA1  
206 ripple occurs only during  $X_{1-2}$ , we find no significant difference in recall accuracy of  $X_{3-4}$ .  
207 CA3/DG does not show a significant difference for either comparison, even though the effect  
208 is in the same direction for higher  $X_{3-4}$  recall when a ripple occurs during both pairs (**Fig.**  
209 **5b**). If the increase in  $X_{3-4}$  recalls comes from  $X_{1-2}$  ripples leading to context reinstatement  
210 and therefore ripples during  $X_{3-4}$ , as opposed to an additive effect where increased ripples  
211 during same category words leads to more recalls from that category, we anticipate that ripples  
212 during both pairs of words will not improve recall of  $X_{1-2}$  recalls. Indeed, when ripples occur  
213 during both  $X_{1-2}$  and  $X_{3-4}$ , recall of  $X_{1-2}$  words does not increase when measuring either CA1  
214 or CA3/DG ripples ( $p > 0.37$ , **Eq. 9**). These findings suggest ripples during early list words  
215 promote category reinstatement later in the list, as reflected by ripples occurring for words from

216 the same category later in the list.

### 217 **Hippocampal ripples during encoding and retrieval of the same word predict clustering.**

218 The previous analysis suggests that ripples can reflect context reinstatement during encoding,  
219 where ripples during early list words promote ripples during late list words when the words carry  
220 strong semantic relations. Our previous work finds ripples reflect context reinstatement during  
221 retrieval, as ripples occur just prior to vocalization of clustered recalls (the pre-retrieval effect  
222 (PRE), see Discussion). Here we ask whether clustering emerges specifically when ripples  
223 occur during both encoding and retrieval of the same words (**Fig. 6a**).

224 To answer this question, for every recalled word we determine if  $\geq 1$  ripple occurs during its  
225 presentation and/or during the PRE window. Assigning each recall to one of four conditions—  
226 encoding  $\pm$  ripple crossed with retrieval  $\pm$  ripple—we assess the proportion of recalls within  
227 each condition that lead to clustering. As predicted, recalls with ripples during both encoding  
228 and retrieval exhibit the highest clustering rates **Fig. 6b**. Using a linear mixed effects model to  
229 assess if ripples during encoding, retrieval, or both lead to clustering, only when CA1 ripples  
230 occur in both conditions do we find a significant increase in clustering **Fig. 6b, left**. Rip-  
231 ples measured in CA3/DG, however, do not significantly predict clustering regardless of their  
232 presence during encoding, retrieval, or both periods **Fig. 6b, right**.

## 233 **Discussion**

234 Measuring medial temporal lobe (MTL) ripples as participants encode and then free re-  
235 call lists of words, we find that clustering of recalls significantly increases during memory  
236 retrieval specifically when hippocampal ripples occur during word presentation. This ripple  
237 subsequent clustering effect (SCE) appears more prominently than a ripple subsequent memory  
238 effect (SME), specifying a role for ripples in binding items to their semantic and/or tempo-  
239 ral associates when forming memories. The magnitude of the hippocampal ripple SCE also

240 aligns with task behavior, as participants with a larger rise in SCE exhibit better clustering of  
241 recalls and superior memory. Finally, two analyses provide evidence that ripples signal context  
242 reinstatement. First, ripples during words shown early in the list lead to ripples during pre-  
243 sentation of semantically-related words many seconds later in the list and, combined, predict  
244 increased recall of these later words. Second, when ripples occur during encoding of a word,  
245 that word leads to clustering significantly more often when a ripple also occurs prior to its  
246 retrieval. These findings, in which hippocampal ripples during memory formation predict sub-  
247 sequent ripple-mediated reinstatement during both later list items and retrieval, suggest ripples  
248 specifically signal encoding and reinstatement of episodic memories.

249 During free recall, hippocampal ripples occur just prior to the retrieval of a previously stud-  
250 ied item, termed the pre-retrieval effect (PRE) (3). The strongest PRE occurs prior to pairs  
251 of recalls bearing strong temporal and/or semantic relations, suggesting that hippocampal rip-  
252 ples reflect an item-to-context reinstatement process (24). A recent review hypothesizes that  
253 sharp-wave ripples perform a dual function by mediating both memory formation and retrieval,  
254 as repetition in support of consolidation (9) may share mechanisms with reinstatement during  
255 retrieval (2). In light of this hypothesis and the ripple SCE results (**Fig. 3**), we asked if the SCE  
256 relates to the PRE. Our final analysis substantiates the hypothesis: recalls with ripples during  
257 both the initial word presentation and in the PRE window lead to clustering significantly more  
258 than recalls without ripples in both periods (**Fig. 6**). In other words, both the SCE and the PRE  
259 appear to reflect a related process (24), where items bind to context during encoding and sub-  
260 sequently reinstate context from items during retrieval. Further, considering that participants  
261 have prior knowledge of the semantics of the common nouns used in this study and that 40%  
262 of recalls lead to clustering (**Fig. 1c**), the SCE also may reflect reinstatement of categorical  
263 context during word presentation (e.g. sea animals in **Fig. 1b-c**). That participants with larger  
264 ripple SCEs show more subsequent clustering of recalls (**Fig. 4b**) supports this interpretation.

265 **Figure 5** also supports categorical reinstatement during encoding, as ripples during a semantic  
266 category early in a list  $X_{1-2}$  predict better recall of words from that same category shown later  
267 in the list ( $X_{3-4}$ ). This effect only happens when ripples also occur during  $X_{3-4}$ , and not when  
268 ripples occur solely during  $X_{1-2}$ , supporting the idea that ripples mediate reinstatement during  
269 the  $X_{3-4}$  words and this process leads to their increased recall.

270 A more conservative interpretation of our data is that the SCE simply reflects engagement  
271 of the hippocampal memory system. Memory tasks with larger demands are more likely to ne-  
272 cessitate hippocampal involvement. For example, studies of hippocampal amnesics on delayed  
273 memory tasks found that deficits only occur if task demand is sufficient (e.g. relatively large set  
274 size or retention delays (25)). And when MTL amnesics performed a delayed free recall task  
275 similar to ours they specifically showed deficits in reinstating context compared to healthy con-  
276 trols, but no difference recalling the most recently-shown items, suggesting deficits occur due to  
277 defects specific to the episodic system (26). Similarly, single unit recordings support the idea  
278 that recruitment of the hippocampus only occurs with sufficient task demands, as hippocampal  
279 neurons fail to fire above baseline levels until memory demands are relatively large (27, 28).  
280 Therefore, when participants engage their hippocampal memory system, whether through in-  
281 creased attention or by forming associations between words from semantic categories, the ripple  
282 SCE may reflect the increase in hippocampal activity. Indeed, the SCE is larger for participants  
283 with higher recall rates (**Fig. 4a**), which is compatible with the idea that participants success-  
284 fully recruiting their episodic system show improved memory. And in the case of **Fig. 6**, where  
285 the same words reflect ripple-mediated episodic encoding and retrieval, in both cases we expect  
286 the hippocampus to be engaged as participants encoding semantically-associated items during  
287 encoding and subsequently retrieve semantically-associated items during retrieval.

288 We replicate previous work (6, 15, 29) showing high frequency activity (HFA) SMEs through-  
289 out the MTL, as each region we test has significantly stronger signal for subsequently recalled

290 vs. not recalled words. The ubiquity of the HFA SME throughout the MTL is possibly of  
291 physiological relevance, as high gamma, which largely overlaps with HFA, is thought to syn-  
292 chronize regions during cognitive tasks (30). Surprisingly, and contrary to a hypothesis from  
293 our pre-registration (<https://osf.io/e98qp>), we do not find a significant ripple SME in either of  
294 the hippocampal subfields we test **Fig. 2b**. And while ripples during presentation of subse-  
295 quently recalled words vs. not recalled words peak  $\sim 0.6$  s when looking at the PSTHs for CA1  
296 or CA3/DG, even when we use a narrower 0.4 to 1.1 s window, we still do not find a significant  
297 ripple SME in either ( $P > 0.22$ , each FDR-corrected across 4 tests of Eq. 2). These results sug-  
298 gest the algorithms designed to detect ripples in rodents (31) achieve a level of specificity that  
299 separates ripples from more ubiquitous high frequency signals. What differences in the detector  
300 for ripples vs. HFA account for this specificity? Two components are likely to be responsible.  
301 First, the ripple detector only considers events with power exceeding a high threshold (3 SD).  
302 Second, the detector requires these candidate events to stay above a lower threshold (2 SD) for  
303 a minimum duration (20 ms) to be considered a ripple. Therefore, we speculate that high fre-  
304 quency activity that does not reach sufficiently high powers or arises only transiently accounts  
305 for the HFA SME. Future work splitting individual events into ripple vs. HFA groups will be  
306 necessary to test these hypotheses.

307 The present report argues that hippocampal ripples signal the encoding of episodic memo-  
308 ries, as the presence of ripples during item encoding predicts the subsequent, ripple-mediated  
309 reinstatement of context during retrieval. Considering the specificity in which hippocampal rip-  
310 ples signal this subsequent clustering effect **Fig. 3b**, as opposed to the more ubiquitous HFA  
311 subsequent memory effect found throughout MTL **Fig. 2c** and other regions (15), future work  
312 might take advantage of ripples as a biomarker of episodic memory formation. In particular,  
313 considering that classification of brain states that predict memory encoding can be used to time  
314 stimulation for the purpose of improving memory (32), future work might incorporate ripple

315 detection to specifically target episodic memory formation for use in translational work.

## 316 **Acknowledgements**

317 Data were collected as part of the DARPA RAM program (Cooperative Agreement N66001-  
318 14-2-4032). This work is supported by NIH Grant R01NS106611 and US Army Medical Re-  
319 search and Development Command Medical Technology Enterprise Consortium Grant MTEC-  
320 20-06-MOM-013. The views, opinions, and/or findings contained in this material are those of  
321 the authors and should not be interpreted as representing the official views or policies of the  
322 Department of Defense or the US Government. We thank the Kahana lab and the Joshua Jacobs  
323 lab for providing valuable feedback on this work.

## 324 **References**

- 325 1. G. Buzsáki, “Hippocampal sharp wave-ripple: A cognitive biomarker for episodic memory  
326 and planning,” *Hippocampus*, vol. 25, pp. 1073–1188, sep 2015.
- 327 2. H. R. Joo and L. M. Frank, “The hippocampal sharp wave–ripple in memory retrieval for  
328 immediate use and consolidation,” *Nature Reviews Neuroscience*, vol. 19, pp. 744–757,  
329 Oct. 2018.
- 330 3. J. J. Sakon and M. J. Kahana, “Hippocampal ripples signal contextually mediated episodic  
331 recall,” *Proceedings of the National Academy of Sciences*, vol. 119, no. 40, p. e2201657119,  
332 2022.
- 333 4. Y. Norman, E. M. Yeagle, S. Khuvis, M. Harel, A. D. Mehta, and R. Malach, “Hippocampal  
334 sharp-wave ripples linked to visual episodic recollection in humans,” *Science*, vol. 365,  
335 p. eaax1030, aug 2019.
- 336 5. Y. Norman, O. Raccach, S. Liu, J. Parvizi, and R. Malach, “Hippocampal ripples and their  
337 coordinated dialogue with the default mode network during recent and remote recollection,”  
338 *Neuron*, vol. 109, pp. 2767–2780.e5, Sept. 2021.
- 339 6. S. Henin, A. Shankar, H. Borges, A. Flinker, W. Doyle, D. Friedman, O. Devinsky,  
340 G. Buzsáki, and A. Liu, “Spatiotemporal dynamics between interictal epileptiform dis-  
341 charges and ripples during associative memory processing,” *Brain*, vol. 5, jul 2021.
- 342 7. Y. Y. Chen, L. Aponik-Gremillion, E. Bartoli, D. Yoshor, S. A. Sheth, and B. L. Foster,  
343 “Stability of ripple events during task engagement in human hippocampus,” *Cell Reports*,  
344 vol. 35, p. 109304, June 2021.
- 345 8. A. P. Vaz, S. K. Inati, N. Brunel, and K. A. Zaghloul, “Coupled ripple oscillations be-  
346 tween the medial temporal lobe and neocortex retrieve human memory,” *Science*, vol. 363,  
347 pp. 975–978, feb 2019.
- 348 9. A. P. Vaz, J. H. Wittig, S. K. Inati, and K. A. Zaghloul, “Replay of cortical spiking se-  
349 quences during human memory retrieval,” *Science*, vol. 367, pp. 1131–1134, mar 2020.
- 350 10. C. W. Dickey, I. A. Verzhbinsky, X. Jiang, B. Q. Rosen, S. Kajfez, B. Stedelin, J. J. Shih,  
351 S. Ben-Haim, A. M. Raslan, E. N. Eskandar, J. Gonzalez-Martinez, S. S. Cash, and E. Hal-  
352 gren, “Widespread ripples synchronize human cortical activity during sleep, waking, and  
353 memory recall,” *Proceedings of the National Academy of Sciences*, vol. 119, jul 2022.
- 354 11. J. Fell, P. Klaver, K. Lehnertz, T. Grunwald, C. Schaller, C. E. Elger, and G. Fernandez,  
355 “Human memory formation is accompanied by rhinal-hippocampal coupling and decou-  
356 pling,” *Nature Neuroscience*, vol. 4, no. 12, pp. 1259–1264, 2001.

- 357 12. D. Osipova, A. Takashima, R. Oostenveld, G. Fernández, E. Maris, and O. Jensen, “Theta  
358 and gamma oscillations predict encoding and retrieval of declarative memory.,” *Journal of*  
359 *Neuroscience*, vol. 26, no. 28, pp. 7523–7531, 2006.
- 360 13. K. A. Paller and A. D. Wagner, “Observing the transformation of experience into memory,”  
361 *Trends in Cognitive Sciences*, vol. 6, no. 2, pp. 93–102, 2002.
- 362 14. J. P. Lachaux, N. Axmacher, F. Mormann, E. Halgren, and N. E. Crone, “High-frequency  
363 neural activity and human cognition: Past, present, and possible future of intracranial EEG  
364 research,” *Progress in Neurobiology*, vol. 98, no. 3, pp. 279–301, 2012.
- 365 15. J. F. Burke, N. M. Long, K. A. Zaghoul, A. D. Sharan, M. R. Sperling, and M. J. Kahana,  
366 “Human intracranial high-frequency activity maps episodic memory formation in space and  
367 time.,” *NeuroImage*, vol. 85, pp. 834–843, 2014.
- 368 16. B. J. Griffiths, G. Parish, F. Roux, S. Michelmann, M. van der Plas, L. D. Kolibius,  
369 R. Chelvarajah, D. T. Rollings, V. Sawlani, H. Hamer, S. Gollwitzer, G. Kreiselmeyer,  
370 B. Staresina, M. Wimber, and S. Hanslmayr, “Directional coupling of slow and fast hip-  
371 pocampal gamma with neocortical alpha/beta oscillations in human episodic memory,”  
372 *PNAS*, vol. 116, pp. 21834–21842, October 2019.
- 373 17. G. Buzsáki and F. L. da Silva, “High frequency oscillations in the intact brain,” *Progress in*  
374 *Neurobiology*, vol. 98, pp. 241–249, sep 2012.
- 375 18. M. W. Howard and M. J. Kahana, “A distributed representation of temporal context,” *Jour-*  
376 *nal of Mathematical Psychology*, vol. 46, no. 3, pp. 269–299, 2002.
- 377 19. M. K. Healey, N. M. Long, and M. J. Kahana, “Contiguity in episodic memory,” *Psycho-*  
378 *nomics Bulletin & Review*, vol. 26, no. 3, pp. 699–720, 2019.
- 379 20. N. M. Long and M. J. Kahana, “Successful memory formation is driven by contextual  
380 encoding in the core memory network,” *NeuroImage*, vol. 119, pp. 332–337, 2015.
- 381 21. S. M. Polyn, K. A. Norman, and M. J. Kahana, “A context maintenance and retrieval model  
382 of organizational processes in free recall,” *Psychological Review*, vol. 116, no. 1, pp. 129–  
383 156, 2009.
- 384 22. C. T. Weidemann, J. E. Kragel, B. C. Lega, G. A. Worrell, M. R. Sperling, A. D. Sha-  
385 ran, B. C. Jobst, F. Khadjevand, K. A. Davis, P. A. Wanda, A. Kadel, D. S. Rizzuto, and  
386 M. J. Kahana, “Neural activity reveals interactions between episodic and semantic memory  
387 systems during retrieval,” *Journal of Experimental Psychology: General*, vol. 148, no. 1,  
388 pp. 1–12, 2019.



- 389 23. E. A. Solomon, B. C. Lega, M. R. Sperling, and M. J. Kahana, “Hippocampal theta codes  
390 for distances in semantic and temporal spaces,” *Proceedings of the National Academy of*  
391 *Sciences*, vol. 116, no. 48, pp. 24343–24352, 2019.
- 392 24. M. J. Kahana, “Computational models of memory search,” *Annual Review of Psychology*,  
393 vol. 71, no. 1, pp. 107–138, 2020.
- 394 25. A. Jeneson, K. N. Mauldin, R. O. Hopkins, and L. R. Squire, “The role of the hippocampus  
395 in retaining relational information across short delays: The importance of memory load,”  
396 *Learning & Memory*, vol. 18, pp. 301–305, Apr. 2011.
- 397 26. D. J. Palombo, J. M. D. Lascio, M. W. Howard, and M. Verfaellie, “Medial temporal lobe  
398 amnesia is associated with a deficit in recovering temporal context,” *Journal of Cognitive*  
399 *Neuroscience*, vol. 31, pp. 236–248, Feb. 2019.
- 400 27. J. Kamiński, S. Sullivan, J. M. Chung, I. B. Ross, A. N. Mamelak, and U. Rutishauser,  
401 “Persistently active neurons in human medial frontal and medial temporal lobe support  
402 working memory,” *Nat Neurosci*, vol. 20, pp. 590–601, 04 2017.
- 403 28. E. Boran, T. Fedele, P. Klaver, P. Hilfiker, L. Stieglitz, T. Grunwald, and J. Sarnthein, “Per-  
404 sistent hippocampal neural firing and hippocampal-cortical coupling predict verbal working  
405 memory load,” *Science Advances*, vol. 5, Mar. 2019.
- 406 29. P. B. Sederberg, A. Schulze-Bonhage, J. R. Madsen, E. B. Bromfield, D. C. McCarthy,  
407 A. Brandt, M. S. Tully, and M. J. Kahana, “Hippocampal and neocortical gamma oscil-  
408 lations predict memory formation in humans,” *Cerebral Cortex*, vol. 17, no. 5, pp. 1190–  
409 1196, 2007.
- 410 30. O. Jensen, J. Kaiser, and J. Lachaux, “Human gamma-frequency oscillations associated  
411 with attention and memory,” *Trends in Neurosciences*, vol. 30, no. 7, pp. 317–324, 2007.
- 412 31. E. Stark, L. Roux, R. Eichler, Y. Senzai, S. Royer, and G. Buzsáki, “Pyramidal  
413 cell-interneuron interactions underlie hippocampal ripple oscillations,” *Neuron*, vol. 83,  
414 pp. 467–480, July 2014.
- 415 32. Y. Ezzyat, P. Wanda, D. F. Levy, A. Kadel, A. Aka, I. Pedisich, M. R. Sperling, A. D.  
416 Sharan, B. C. Lega, A. Burks, R. Gross, C. S. Inman, B. C. Jobst, M. Gorenstein, K. A.  
417 Davis, W. G. A., M. T. Kucewicz, J. M. Stein, R. J. Gorniak, S. R. Das, D. S. Rizzuto, and  
418 M. J. Kahana, “Closed-loop stimulation of temporal cortex rescues functional networks and  
419 improves memory,” *Nature Communications*, vol. 9, no. 1, p. 365, 2018.
- 420 33. J. N. Gelinias, D. Khodagholy, T. Thesen, O. Devinsky, and G. Buzsáki, “Interictal epilepti-  
421 form discharges induce hippocampal–cortical coupling in temporal lobe epilepsy,” *Nature*  
422 *medicine*, vol. 22, no. 6, p. 641, 2016.

- 423 34. D. Sullivan, J. Csicsvari, K. Mizuseki, S. Montgomery, K. Diba, and G. Buzsaki, “Relationships between hippocampal sharp waves, ripples, and fast gamma oscillation: Influence  
424 of dentate and entorhinal cortical activity,” *The Journal of Neuroscience*, vol. 31, pp. 8605–  
425 8616, June 2011.
- 427 35. B. B. Avants, N. J. Tustison, G. Song, P. A. Cook, A. Klein, and J. C. Gee, “A reproducible  
428 evaluation of ANTs similarity metric performance in brain image registration,” *NeuroImage*,  
429 vol. 54, pp. 2033–2044, feb 2011.
- 430 36. P. A. Yushkevich, J. B. Pluta, H. Wang, L. Xie, S.-L. Ding, E. C. Gertje, L. Mancuso,  
431 D. Kliot, S. R. Das, and D. A. Wolk, “Automated volumetry and regional thickness anal-  
432 ysis of hippocampal subfields and medial temporal cortical structures in mild cognitive  
433 impairment,” *Human Brain Mapping*, vol. 36, no. 1, pp. 258–287, 2015.
- 434 37. B. Fischl, A. van der Kouwe, C. Destrieux, E. Halgren, F. Ségonne, D. H. Salat, E. Busa,  
435 L. J. Seidman, J. Goldstein, D. Kennedy, *et al.*, “Automatically parcellating the human  
436 cerebral cortex,” *Cerebral Cortex*, vol. 14, no. 1, pp. 11–22, 2004.
- 437 38. A. R. Dykstra, A. M. Chan, B. T. Quinn, R. Zepeda, C. J. Keller, J. Cormier, J. R. Madsen,  
438 E. N. Eskandar, and S. S. Cash, “Individualized localization and cortical surface-based  
439 registration of intracranial electrodes,” *NeuroImage*, vol. 59, no. 4, pp. 3563–3570, 2012.
- 440 39. A. Klein and J. Tourville, “101 labeled brain images and a consistent human cortical label-  
441 ing protocol,” *Frontiers in Neuroscience*, vol. 6, 2012.
- 442 40. R. Desikan, B. Segonne, B. Fischl, B. Quinn, B. Dickerson, D. Blacker, R. L. Buckner,  
443 A. Dale, A. Maguire, B. Hyman, M. Albert, and N. Killiany, “An automated labeling sys-  
444 tem for subdividing the human cerebral cortex on MRI scans into gyral based regions of  
445 interest,” *NeuroImage*, vol. 31, no. 3, pp. 968–80, 2006.
- 446 41. H. G. Rey, I. Fried, and R. Q. Quiroga, “Timing of single-neuron and local field potential  
447 responses in the human medial temporal lobe,” *Current Biology*, vol. 24, pp. 299–304, feb  
448 2014.

449 **Figures**

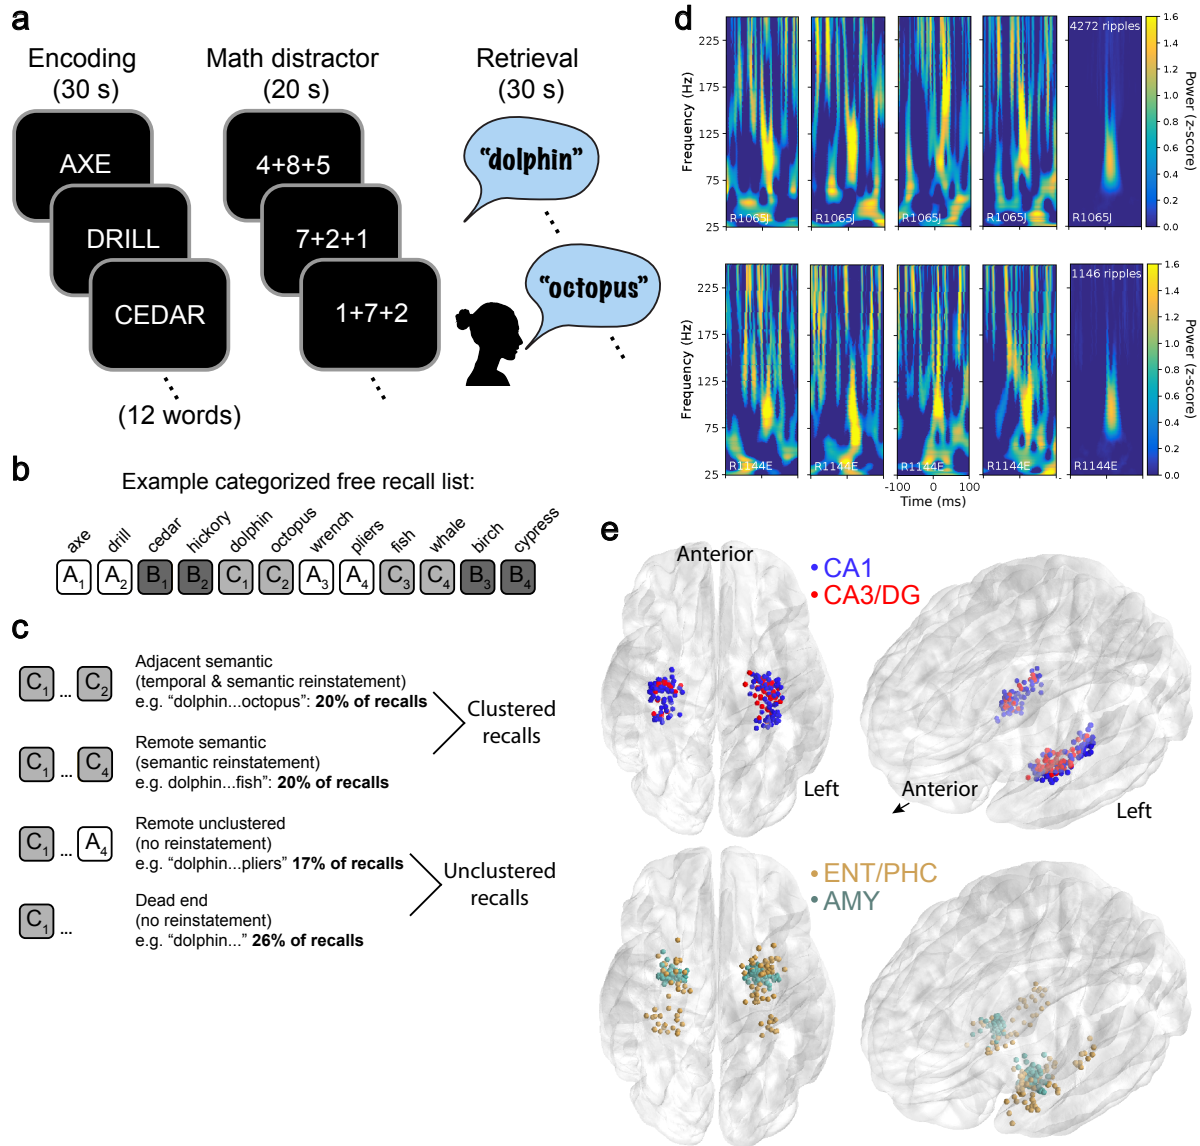

450

451 **Figure 1. Free recall task design and ripple detection details.** (a) Task diagram of delayed free re-  
 452 call, in which participants perform a math distractor in between word presentations and a retrieval pe-  
 453 riod. (b) Structure of categorized word lists used in this task variant. A, B, and C are each semantic cat-  
 454 egories (tools, trees, and sea animals in this case). The two pairs of words from the same category are  
 455 never shown back-to-back (c) Types of recall transitions in the categorized free recall task and percent-  
 456 age of recalls that lead to each. Note that adjacent, non-semantic transitions are only 3% of recalls due  
 457 to the semantic nature of the task so are not analyzed. (d) Each row displays EEG spectrograms aligned  
 458 to the start of ripples occurring during word presentation for two participants with hippocampal CA1

459 electrodes. The first four columns show single trial examples while the fifth column shows the average  
460 across all ripples during word presentation for all CA1 electrodes in all sessions for each participant.  
461 **(e)** Electrode bipolar pair midpoint localizations for all participants performing catFR. Shown are hip-  
462 pocampal subfields CA1 and CA3/dentate gyrus (CA3/DG), entorhinal (ENT) and parahippocampal  
463 (PHC) cortex, and amygdala (AMY).

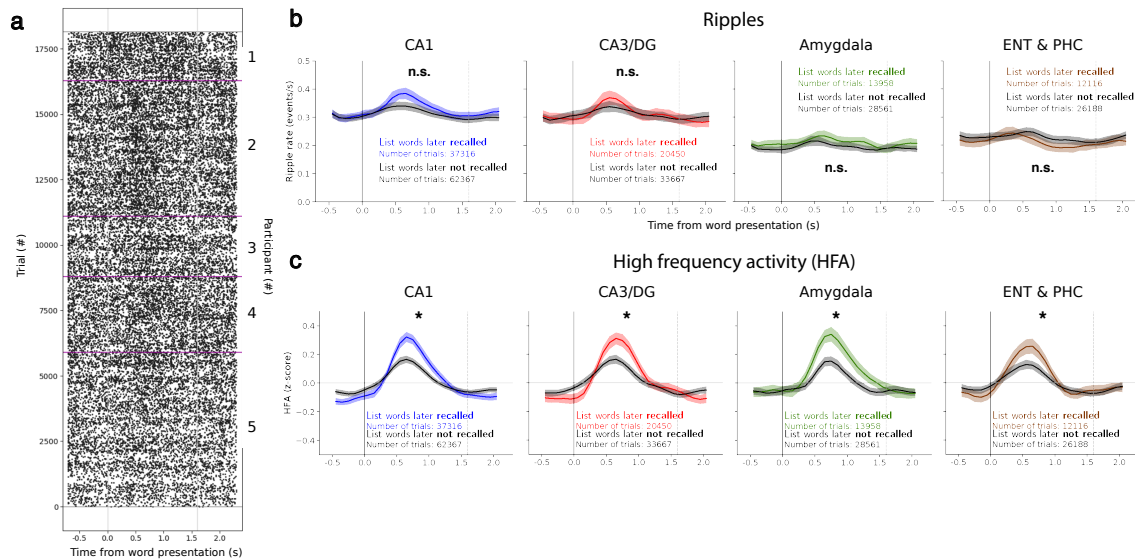

464

465 **Figure 2. High frequency activity (but not ripples) shows a subsequent memory effect (SME)**  
 466 **in the medial temporal lobe (MTL).** (a) Raster plot for 5 example participants with EEG from hip-  
 467 pocampal electrode pairs aligned to time of word presentation. Same participants as the first 5 shown in  
 468 Sakon & Kahana 2021, Fig. 4b. Each dot represents the start time of a single detected ripples. Vertical  
 469 gray lines denote the 1.6 s onscreen period for each word, and purple horizontal lines divide partic-  
 470 ipants. We define a trial as a recording from a single bipolar pair during the presentation of a single  
 471 word. (b) Ripple peri-stimulus time histograms (PSTH) averaged across all participants with bipolar  
 472 electrode pairs localized to hippocampal subfields CA1 or CA3/DG, AMY, or ENT/PHC. We label the  
 473 number of trials for words that are later recalled or not recalled during the subsequent retrieval period  
 474 within each subpanel. Error bands are SE from a separate mixed model calculated at each time bin (Eq.  
 475 1). Significance of mixed model assessing ripple rates between words subsequently recalled vs. not  
 476 recalled (Eq. 2): CA1,  $\beta = -0.0020 \pm 0.0071$ ,  $P = 0.78$ ; CA3/DG,  $\beta = -0.0052 \pm 0.010$ ,  $P = 0.78$ ; AMY,  
 477  $\beta = 0.0030 \pm 0.0066$ ,  $P = 0.78$ ; ENT/PHC,  $\beta = -0.017 \pm 0.0084$ ,  $P = 0.19$  (each FDR-corrected across 4  
 478 tests of Eq. 2). (c) PSTH for high frequency activity (HFA) using the frequency range 64-178 Hz. HFA  
 479 is z-scored for each session by averaging across trials and time bins and normalizing with the stan-  
 480 dard deviation across trials. Error bands are SE from a separate mixed model calculated at each time  
 481 bin (Eq. 1). Significance of mixed model assessing ripple rates between words subsequently recalled  
 482 vs. not recalled (Eq. 2): CA1,  $\beta = 0.10 \pm 0.022$ ,  $P = 1.3 \times 10^{-5}$ ; CA3/DG,  $\beta = 0.11 \pm 0.028$ ,  $P = 7.9 \times$   
 483  $10^{-5}$ ; AMY,  $\beta = 0.16 \pm 0.032$ ,  $P = 2.1 \times 10^{-6}$ ; ENT/PHC,  $\beta = 0.10 \pm 0.030$ ,  $P = 6.1 \times 10^{-4}$  (each FDR-  
 484 corrected across 4 tests of Eq. 2).

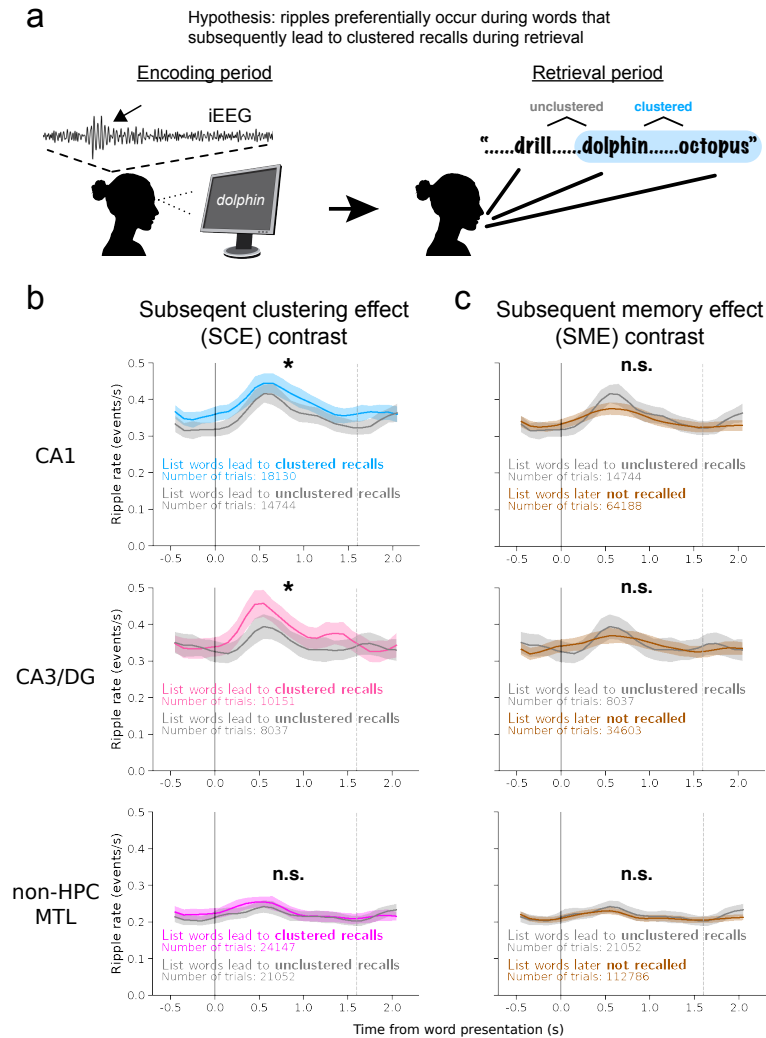

485

486 **Figure 3. Hippocampal ripples signal a subsequent clustering effect (SCE).** (a) Diagram explain-  
 487 ing the subsequent clustering effect. When words are recalled during the retrieval period (right) we  
 488 examine the relationships between the recall order to identify semantic or temporal relationships. Us-  
 489 ing the example list shown throughout the manuscript (see **Fig. 1b**), dolphin and octopus are adja-  
 490 cent semantic as they were a pair shown back-to-back and are from the same semantic category. We  
 491 then measure ripples during the encoding period (left) when dolphin was presented as this was the  
 492 word that led to the subsequent transition (or clustering) between recalls during retrieval. (b) Ripples  
 493 rates grouped by clustering category for CA1, CA3/DG, and all other non-HPC MTL sites (includ-  
 494 ing AMY, ENT, PHC, and perirhinal cortex). Each plot shows words that lead to subsequent clus-  
 495 tering (adjacent semantic represents temporal and semantic clustering) vs. those that do not (remote  
 496 unclustered combined with dead ends). Significance of mixed model comparing clustered vs. unclus-  
 497 tered groups for each region: CA1,  $\beta = 0.024 \pm 0.013$ ,  $P = 6.2 \times 10^{-3}$ ; CA3/DG,  $\beta = 0.043 \pm 0.010$ ,  
 498  $P = 7.8 \times 10^{-5}$ ; non-HPC MTL,  $\beta = 0.0069 \pm 0.0053$ ,  $P = 0.19$  (each FDR-corrected across 3 tests of

499 Eq. 2). To directly assess if hippocampal regions show a stronger SCE than non-HPC MTL, we com-  
500 pare using a mixed model measuring the interaction between clustering groups and region to predict  
501 SCE: CA1 vs. non-HPC MTL,  $\beta = 0.026 \pm 0.0074$ ,  $P = 4.1 \times 10^{-4}$ ; CA3/DG vs. non-HPC MTL,  $\beta$   
502  $= 0.046 \pm 0.0086$ ,  $P = 2.6 \times 10^{-7}$  (each FDR-corrected across 2 tests of Eq. 3). (c) Each plot shows a  
503 breakdown of words that are subsequently recalled but without clustering (remote unclustered and dead  
504 ends) vs. those that are not recalled. Significance of mixed model comparing these groups for each re-  
505 gion: CA1,  $\beta = -0.0095 \pm 0.0076$ ,  $P = 0.32$ ; CA3/DG,  $\beta = -0.015 \pm 0.0089$ ,  $P = 0.25$ ; non-HPC MTL,  $\beta$   
506  $= -0.0039 \pm 0.0042$ ,  $P = 0.35$  (each FDR-corrected across 3 tests of Eq. 2). For all plots vertical black  
507 and gray lines denote word presentation onset and offset and error bands are SE from a separate mixed  
508 model calculated at each time bin (Eq. 1).



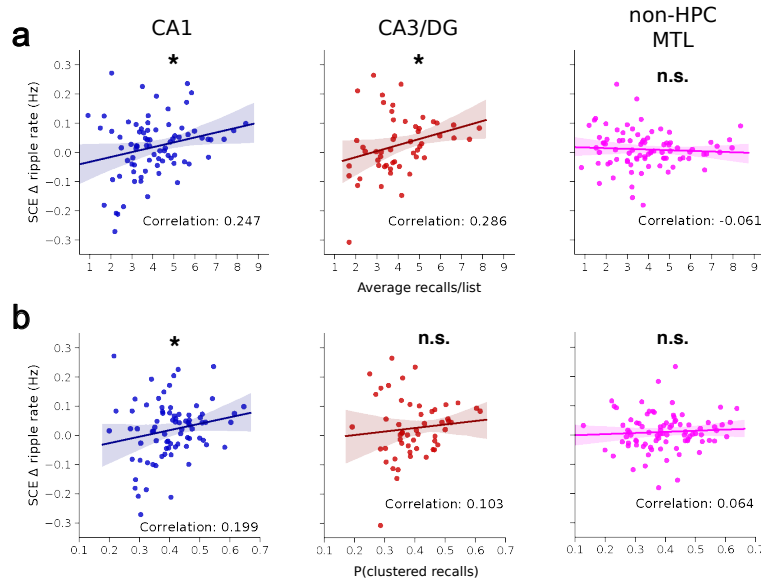

509

510 **Figure 4. The ripple subsequent clustering effect (SCE) relates to memory performance. (a)** For  
511 each participant, we relate the change in ripple rate during word presentation between words that lead  
512 to subsequent clustering (adjacent semantic and remote semantic) vs. no clustering (remote unclus-  
513 tered and dead ends) to the average number of words recalled on each list by that participant. Sig-  
514 nificance of mixed model comparing this change in ripple rate SCE vs. the average recalls per list:  
515 CA1,  $\beta = 0.015 \pm 0.0056$ ,  $P = 0.017$ ; CA3/DG,  $\beta = 0.022 \pm 0.0089$ ,  $P = 0.017$ ; non-HPC MTL,  $\beta =$   
516  $-0.0014 \pm 0.0033$ ,  $P = 0.68$  (each FDR-corrected across 3 tests of Eq. 5). To directly assess if hippocam-  
517 pal regions show a stronger relationship between SCE and recalls than non-HPC MTL, we compare  
518 using a mixed model measuring the interaction between recalls and region to predict SCE: CA1 vs.  
519 non-HPC MTL,  $\beta = 0.017 \pm 0.0061$ ,  $P = 6.5 \times 10^{-3}$ ; CA3/DG vs. non-HPC MTL,  $\beta = 0.023 \pm 0.0079$ ,  
520  $P = 6.5 \times 10^{-3}$  (FDR-corrected across 2 tests of Eq. 6). **(b)** For each participant, we relate the same  
521 change in ripple rate from **a** to the average proportion of clustered recalls (i.e. recalls that are adjacent  
522 semantic and remote semantic). Significance of mixed model comparing the SCE vs. the proportion  
523 of clustered recalls: CA1,  $\beta = 0.25 \pm 0.099$ ,  $P = 0.040$ ; CA3/DG,  $\beta = 0.14 \pm 0.14$ ,  $P = 0.49$ ; non-HPC  
524 MTL,  $\beta = -0.0095 \pm 0.053$ ,  $P = 0.86$  (each FDR-corrected across 3 tests of Eq. 7). To directly assess if  
525 hippocampal regions show a stronger relationship between SCE and clustering than non-HPC MTL, we  
526 compare using a mixed model measuring the interaction between proportion of clustered recalls and re-  
527 gion to predict SCE: CA1 vs. non-HPC MTL,  $\beta = 0.25 \pm 0.095$ ,  $P = 0.017$ ; CA3/DG vs. non-HPC MTL,  
528  $\beta = 0.11 \pm 0.12$ ,  $P = 0.34$  (FDR-corrected across 2 tests of Eq. 8).



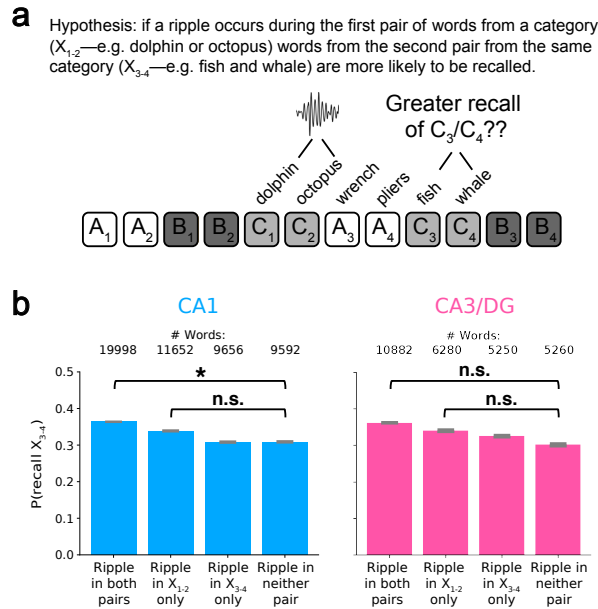

529

530 **Figure 5. Presence of hippocampal ripples during initial category presentation leads to better re-**  
 531 **call of words from the same category.** (a) Diagram of hypothesis that ripples during presentation of  
 532 words from a category will increase likelihood of recalling subsequently presented words from same  
 533 category. (b) Accuracy of recall for the second pair of words from a category ( $X_{3-4}$ ) when a ripple oc-  
 534 curs during either of the first pair of words from a category ( $X_{1-2}$ ), either of the second pair of words  
 535 from a category ( $X_{3-4}$ ), both, or neither. The number of total words for each of these pools is indicated  
 536 above the bars. Error bars are SE of proportions. Significance of mixed model term assessing the im-  
 537 pact on accuracy for  $X_{3-4}$  based on the presence of ripples during  $X_{1-2}$ : CA1,  $\beta = -0.012 \pm 0.0063$ ,  $P =$   
 538  $0.12$ ; CA3/DG,  $\beta = -0.0059 \pm 0.0087$ ,  $P = 0.50$  (each FDR-corrected across two tests of Eq. 9). Signifi-  
 539 cance of mixed model term assessing the impact on accuracy for  $X_{3-4}$  based on the presence of ripples  
 540 during both  $X_{1-2}$  and  $X_{3-4}$ : CA1,  $\beta = 0.023 \pm 0.0083$ ,  $P = 0.010$ ; CA3/DG,  $\beta = 0.012 \pm 0.011$ ,  $P = 0.30$   
 541 (each FDR-corrected across two tests of Eq. 9).

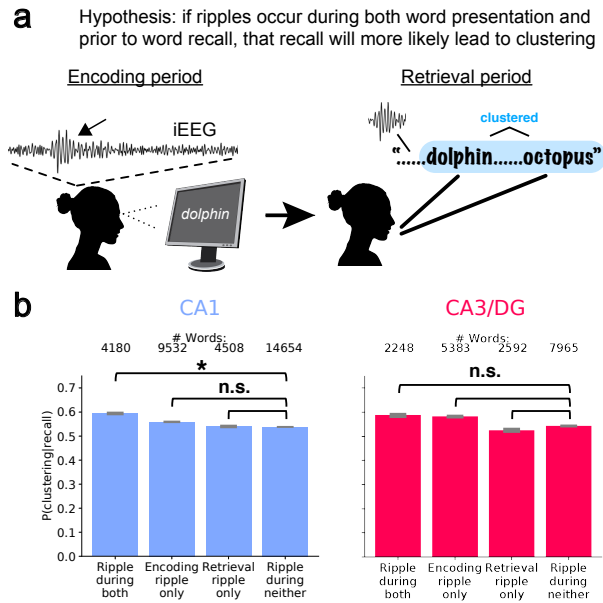

542

543 **Figure 6. Words with ripples during both word presentation and prior to recall lead to cluster-**  
 544 **ing.** (a) Diagram of hypothesis that clustering arises when ripples occur during both the presentation of  
 545 and prior to the recall of words. (b) Proportion of recalls that lead to clustering conditioned on whether  
 546 the recalled word has  $\geq 1$  ripple occur during its initial presentation and/or prior to its vocalization. The  
 547 number of total recalls for each condition is indicated above the bars. Error bars are SE of proportions.  
 548 Significance of mixed model terms assessing the impact on clustering of the presence of ripples during  
 549 both word encoding or retrieval: CA1,  $\beta = 0.037 \pm 0.0074$ ,  $P = 9.5 \times 10^{-7}$ ; CA3/DG,  $\beta = 0.023 \pm 0.017$ ,  
 550  $P = 0.17$  (each FDR-corrected across 2 tests of Eq. 10). P-values for remaining terms are not signifi-  
 551 cant ( $P \geq 0.065$ , each FDR-corrected).

## 552 **Materials and Methods**

553 **Human participants.** Comprising the dataset are intracranial recordings from 129 adult participants  
554 in the hospital for drug-resistant epilepsy surgery with subdural electrodes placed on the cortical sur-  
555 face or within the brain to localize epileptic activity. Collaborating hospitals include Thomas Jeffer-  
556 son University Hospital (Philadelphia, PA), University of Texas Southwestern Medical Center (Dal-  
557 las, TX), Emory University Hospital (Atlanta, GA), Dartmouth-Hitchcock Medical Center (Lebanon,  
558 NH), Hospital of the University of Pennsylvania (Philadelphia, PA), Mayo Clinic (Rochester, MN), and  
559 Columbia University Hospital (New York, NY). All participants consented to research under a protocol  
560 approved by the Institutional Review Board at the University of Pennsylvania via a reliance agreement  
561 with each hospital.

562  
563 **Free recall task.** Participants were tested on a delayed free recall task in which each "list" comprised  
564 viewing a sequence of common nouns with the intention to commit them to memory. The task was  
565 run at bedside on a laptop and participants were tasked to finish up to 25 lists for a whole session or  
566 12 lists for a half-session. The free recall task consisted of four phases per list: countdown, encoding,  
567 distractor, and retrieval (**Fig. 1a**). Each list began with a 10-second countdown period with numbers  
568 displayed from 10 to 1. For encoding, participants were sequentially presented 12 words centered on  
569 the screen that were selected at random—without replacement in each whole session or two consecutive  
570 half sessions—from a pool of 300 high frequency, intermediate-memorable English or Spanish nouns  
571 (<http://memory.psych.upenn.edu/WordPools> (22)). Each word was presented for 1.600 s with a jittered  
572 0.75-1.2 s (randomly sampled uniform distribution) blank screen shown after each word. After encod-  
573 ing was a distractor period where participants performed 20 seconds of arithmetic math problems to  
574 disrupt their memory for recently-shown items. Math problems were of the form  $A+B+C=??$ , where  
575 each letter corresponds to a random integer and participants typed their responses into the laptop key-  
576 board. The final phase is retrieval, in which participants had 30 seconds to recall as many words—in any  
577 order—from the most recent list as possible. Retrieval began with a series of asterisks accompanied by  
578 a 0.3 s, 60 Hz beep to signal for the participants to begin vocalizing recalled words. Vocalizations were  
579 recorded and later annotated offline using Penn TotalRecall (<http://memory.psych.upenn.edu/TotalRecall>)  
580 to determine correct and incorrect recalls. For each session the participant began with a practice list of  
581 the same words that we do not include in the analysis.

582  
583 All analyses in this manuscript are done on a variant called categorized free recall, in which each list  
584 is comprised of words with semantic relationships. For every whole session (or consecutive half ses-  
585 sions), words were drawn from a pool of 300 that included 12 words each from 25 categories cre-  
586 ated using Amazon Mechanical Turk to crowdsource typical exemplars for each category (22). For  
587 each list, three semantic categories were randomly chosen, and the four words from each category  
588 were presented sequentially in pairs. Pairs from the same category were never shown back-to-back  
589 (in other words, the four words from the same category were never shown in a row). This setup al-  
590 lowed us to study both adjacently (same pair) and remotely presented words from the same category.

591  
592 **Intracranial electroencephalogram (iEEG) recordings.** iEEG was recorded from macroelectrodes on  
593 subdural grids and strips (intercontact spacing 10.0 mm) or depth electrodes (intercontact spacing 3-6  
594 mm) using DeltaMed XItek (Natus), Grass Telefactor, Nihon-Kohden, Blackrock, or custom Medtronic

595 EEG systems. Signals were sampled at 500, 512, 1000, 1024, 1600, 2000 or 2048 Hz and downsam-  
596 pled using a Fourier transformation to 500 Hz for all analyses. Initial recordings were referenced to  
597 a common contact, the scalp, or the mastoid process, but to eliminate possible system-wide artifacts  
598 and to better isolate localized high frequency signals we applied bipolar rereferencing between pairs of  
599 neighboring contacts. Bipolar referencing is ideal as the spatial scale of ripples is unlikely to exceed in-  
600 tercontact spacing of our recordings (3-10 mm) (8). Line removal is performed between 58-62 using a  
601 4th order Butterworth filter (120 Hz is in our sensitive ripple range and we did not find artifacts in these  
602 frequencies).

603  
604 **Ripple detection.** Detection of ripples is identical to our previous work, where we performed nu-  
605 merous control analyses to ensure the detector is robust to vocalization artifacts, frequency window  
606 selection, correlations across channels, and seizuregenic activity (3), and is based on prior human  
607 work (4, 33). Briefly, local field potential from bipolar iEEG channels is bandpass Hamming filtered  
608 from 70-178 Hz, rectified, squared, smoothed, and normalized to find candidate events exceeding 3  
609 standard deviations (SD) that are expanded to find their duration above 2 SDs. Events are consid-  
610 ered ripples if the expanded duration is between 20 and 200 ms and not within 30 ms of another ex-  
611 panded event (in which case the events are merged). To avoid pathological interictal epileptiform dis-  
612 charges (IEDs), LFP is bandpass Hamming filtered from 25-58 Hz rectified, squared, smoothed and  
613 normalized to detect events 4 SD above the mean. Ripples within 50 ms of an IED event are removed.

614  
615 We treat ripples as discrete events (**Fig. 2a**) with the timestamp set to the beginning of each ripple (**Fig.**  
616 **1d**). The average power of events is  $\sim 90$  Hz, although individual events peak throughout the 70-178 Hz  
617 range (**Fig. 1d** shows 8 single ripple examples). Most participants had multiple MTL contacts within  
618 their montage, thereby providing iEEG recordings from multiple channels for every word presentation.  
619 As with previous work (3, 4, 8), since the spacing of clinical electrodes (3-10 mm) is much farther than  
620 ripples are expected to travel in the brain ( $< 0.2$ mm, (34)), we consider each presented word for each  
621 channel as a separate "trial". To ensure ripples are not double-counted across neighboring channels we  
622 use a combination of automated channel and session removal (by measuring correlations across trials  
623 and channels, respectively) and manual inspection of raster plots (**Fig. 2a**) as detailed in previous work  
624 (3).

625  
626 **High frequency activity (HFA).** We calculate HFA by averaging oscillatory power extracted using  
627 Morlet wavelets at 10 logarithmically-spaced frequencies from 64-178 Hz, with the lower bound as in  
628 previous HFA work (6, 15) and the upper bound the same as for the ripple detector. To measure powers,  
629 we use the following procedure using the bipolar-referenced iEEG from each trial from 1 s before word  
630 presentation until 2.6 s after word presentation. This window includes a 0.3 s buffer on both sides to  
631 avoid edge effects during Morlet transform and 0.7 s (comprised of the inter-trial interval) both before  
632 and after word presentation to incorporate as part of the normalization procedure. The signal is then  
633 Butterworth filtered from 118-122 Hz and high-pass filtered from 0.5 Hz. A Morlet wavelet transform  
634 (using PTSA, see notebooks 5 and 6 on  
635 <https://github.com/pennmem/CMLWorkshop>) is done for each of the 10 frequencies (64.0, 71.7, 80.3,  
636 90.0, 100.8, 113.0, 126.6, 141.8, 158.9, and 178), the buffers are removed, and the log of each value is  
637 taken. Next, we resample to 100 ms bins, which leaves us with a FREQUENCY X WORD X CHAN-  
638 NEL X 30 BIN array. We then z-score this array by subtracting the average across words and bins,

639 and dividing by the standard deviation across words after averaging across bins. Finally, we aver-  
640 age across the 10 frequencies to arrive at a final HFA value for each WORD X CHANNEL X BIN.

641

642 To make the fairest comparison between HFA and ripples, we use the exact same set of trials as se-  
643 lected by our criteria for the ripple detection algorithm. That is, the same word presentations recorded  
644 in the same channels (note the identical trial counts in **Fig 2b-c**).

645

646 **Anatomical localization.** Localization of contacts is identical to previous work (3). Briefly, pre-  
647 implant structural T1- and T2-weighted MRI scans were used to define the anatomical regions for each  
648 participant in addition to a post-implant CT scan to localize electrodes in the participant brain, which  
649 were coregistered using Advanced Normalization Tools (35). The point source of iEEG for bipolar  
650 electrode pairs is considered to be the midpoint between adjacent electrode contacts. Center to center  
651 electrode spacing was between 3-10 mm as chosen by the neurosurgical teams for medical reasons.

652

653

654 Similar to our previous work (3), we split channels localized to hippocampus into two groups, CA1  
655 and CA3/DG, since we have sufficient sample size to test our hypotheses in each. However, since we  
656 use the midpoint of bipolar electrode pairs for signal localization (hippocampal pairs are 3-6 mm apart  
657 as only stereo-EEG depth electrodes reach hippocampus), and considering an estimated 350,000 neu-  
658 rons contribute to macroelectrode LFP (3), many of the channels are likely to reflect ripples crossing  
659 subfields.

660

661 Bipolar electrode pairs in hippocampal subfields CA1 and dentate gyrus (DG) were localized using  
662 a combination of neuroradiologist labels (Joel M. Stein and Sandhitsu Das, Penn Medicine) and the  
663 automated segmentation of hippocampal subfields (ASHS) technique utilizing the T2 scan (36). How-  
664 ever, we label the DG pairs as CA3/DG due to the difficulty in delineating these regions. Sites localized  
665 to CA3 are not included in this group as ASHS achieves poor classification of this subfield compared  
666 to CA1 and DG (36), and because of its relatively small volume ~15x fewer channels are localized to  
667 CA3 than DG.

668

669 We also analyze electrode pairs in non-hippocampal cortical regions, which include entorhinal (ENT),  
670 parahippocampal (PHC), and perirhinal cortex and amygdala. We used a combination of neuroradiol-  
671 ogist labels and an automated segmentation pipeline combining whole-brain cortical reconstructions  
672 from the T1 scan in Freesurfer (37), an energy minimization algorithm to snap electrodes to the cortical  
673 surface (38), and boundaries and labels from the Desikan-Killiany-Tourville cortical parcellation proto-  
674 col (39, 40).

675

676 **Plots and binning.** Raster plots are formed by aligning the iEEG to the time of word presentation and  
677 plotting the time of the beginning of each detected ripple. Peri-stimulus time histograms (PSTHs) are  
678 formed by binning ripples (100 ms bins) and averaging the raster plots across participants after separat-  
679 ing words into groups (e.g. subsequently recalled vs. not recalled words). For visualization only, these  
680 PSTHs are triangle smoothed using a 5-bin window (3, 4) and a separate linear mixed model with ses-  
681 sions nested in participants is run at each bin to calculate the mean and error bars (SE) (**Eq. 1**). Ripple  
682 rates are the frequency in Hz. within each bin.

683

684 The default analysis window used to assess the ripple subsequent memory effect (SME) and the sub-  
685 sequent clustering effect (SCE) throughout the paper is 0.1 to 1.7 s from beginning of word presenta-  
686 tion. We offset 0.1 s from time on screen to account for latencies from the time of presentation until  
687 signals reach MTL circuits (41). The analysis window for HFA is from 0.4 to 1.1 s after word presenta-  
688 tion. These windows are based on pilot analyses done on the first half of the data and pre-registered  
689 on the Open Science Framework (OSF, <https://osf.io/e98qp>). We also report statistics for the SME from  
690 0.4 to 1.1 s as a comparison to the window used for HFA. To measure pre-retrieval effect (PRE) rip-  
691 ples during the retrieval period we use the window from -1.1 to -0.1 s prior to recall vocalization (3).

692

693 **Clustering.** When participants correctly recall a series of words during the retrieval period, the order  
694 of word recall provides a window into the organization of their memory. For categorized free recall, as  
695 participants transition from one recall to the next, we expect them to cluster recalls based on semantic  
696 and/or temporal relationships between words on the list. As explained in the Free Recall task section  
697 above, each 12-word list in this task had words drawn from 3 categories, with the 4 words from the  
698 same category presented in non-contiguous pairs. This setup provides three distinct forms of clustering  
699 between consecutive recalls: adjacent semantic (20% of recalls lead to this transition), remote seman-  
700 tic (20%), and adjacent non-semantic (3%) (examples given in **Fig. 1b-c**). Adjacent semantic are two  
701 words from the same category shown as a consecutive pair during encoding while remote semantic are  
702 two words from the same category from pairs separated by other words. Adjacent, non-semantic transi-  
703 tions were not analyzed due to their small sample size. Recalls that do not lead to clustering include re-  
704 mote unclustered (17%), where consecutive words were neither from the same category or shown back-  
705 to-back, and dead ends (26%), which are the last recall that do not lead to a subsequent recall. The re-  
706 maining recalls were those that led to intrusions or repeats (14%).

707

708 For the SCE contrast we pool clustered and unclustered recalls in **Fig. 3b**, and for the SME contrast we  
709 pool unclustered recalls in **Fig. 3c**. However, in the caption for the SCE contrast, we also provide statis-  
710 tics for pairwise models between each of the clustering types (adjacent semantic and remote semantic)  
711 vs. unclustered recalls. And in the caption for the SME contrast, we also provide statistics for pair-  
712 wise models between each of the unclustered types (remote unclustered and dead ends) vs. not recalled  
713 words.

714

715 **Held out data and pre-registration.** The large size of our dataset allowed us to set aside ~35% of tri-  
716 als in order to come up with initial figures and hypotheses that can then be confirmed with the entire  
717 dataset. That is, after creating a raster plot to ensure all data is in usable form after the data-cleaning  
718 steps outlined in Ripple Detection above, we used a random kernel to select a subset of participants  
719 comprising 35% of hippocampal trials. Once we set our initial analysis parameters and figures based  
720 on this exploratory 35% of data, we registered them along with hypotheses based on these figures on  
721 the Open Science Framework (<https://osf.io/e98qp>), which also contains specific details on the random-  
722 ization and sampling plan. Here we present the statistics and figures for the entire dataset based on the  
723 analysis parameters defined in this pre-registration.

724

725 **Equations.** Linear mixed effects models are run using the function MixedLM in the python package  
726 statsmodels with restricted maximum likelihood and Nelder-Mead optimization with a maximum of



727 2000 iterations. The following equations are written in pseudocode of the inputs to statsmodels. Statis-  
728 tics are presented as:  $\beta \pm SE, P - value$ , where  $\beta$  is the coefficient being tested and  $SE$  is the standard  
729 error of the coefficient being fit. For all comparisons the first group takes the indicator value 1 and the  
730 second takes 0 in the model. For example, clustered vs. unclustered trials are assigned 1 and 0, mean-  
731 ing if clustered is greater the coefficient will be positive.

732

We use mixed effects models to plot the mean and standard error of ripple rates for all peri-stimulus  
time histograms (PSTHs). For a given group of trials, a separate mixed effect model is run at each 100  
ms bin:

$$ripple\_rate \sim 1 + (1|participant) + (1|participant : session) \quad (1)$$

733 where  $1|participant$  is a random intercept and slope for each participant,  $(1|participant : session)$  is  
734 a random intercept and slope for each session nested in each participant, and  $ripple\_rate$  is the average  
735 ripple rate in that bin for a given trial. The solved coefficient and its standard error (SE) are used to plot  
736 the mean  $\pm$  SE at each bin (after a 5-point triangle smooth of the means). Plotting the average ripple  
737 rates across trials looks similar, but plotting using the mixed effects model fits gives a closer approxi-  
738 mation to the statistical model used to compare groups of trials in **Eq. 2**.

739

To test the hypothesis that ripples rates are higher during words that are subsequently recalled vs. sub-  
sequently not recalled (**Fig. 2b & 3b**), we use the linear mixed effects model:

$$ripple\_rate \sim recall\_indicator + (recall\_indicator|participant) + (recall\_indicator|participant : session) \quad (2)$$

740 where  $recall\_indicator$  is an indicator variable with value 1 for words subsequently recalled and 0 for  
741 those that are not,  $(recall\_indicator|participant)$  are random intercepts and slopes for each partici-  
742 pant,  $(recall\_indicator|participant : session)$  are random intercepts and slopes for sessions nested  
743 in each participant, and  $ripple\_rate$  is the average ripple rate for each trial from 0.1 to 1.7 s following  
744 word presentation. The null hypothesis is no difference between ripple rates on words that are subse-  
745 quently remembered v. subsequently not recalled.

746

747 We use the same model for comparisons between groups, such as words that subsequently lead to clus-  
748 tered recalls vs. unclustered recalls **Fig. 3**). In this case, instead of recall indicator, the predictor in-  
749 dicates if a recalled word subsequently leads to clustering or not (e.g. subsequently clustered vs. un-  
750 clustered recalls, **Fig. 3b**). We also use this model to compare SMEs for HFA from 0.4-1.1 s following  
751 word presentation and as a comparison SMEs for ripples from 0.4-1.1 s.

752

To compare SCE between regions we use the linear mixed-effects model:

$$ripple\_rate \sim clustering\_indicator * region\_indicator + (clustering\_indicator * region\_indicator|participant) + (clustering\_indicator * region\_indicator|participant : session) \quad (3)$$

753 where *clustering\_indicator* is 1 if a word subsequently is recalled and leads to clustering (i.e. adja-  
754 cent semantic or remote semantic) or 0 if a word is recalled and does not lead to clustering (i.e. remote  
755 unclustered or dead end), and *region\_indicator* is 0 or 1 for two given regions. The \* indicates separate  
756 coefficients are calculated for each term and the interaction. Random intercepts and slopes for sessions  
757 nested in participants follows the same structure as **Eq. 2**. The null hypothesis is no difference in the  
758 interaction between SCE and region.

759

We also compare the SCE and the SME directly in the same model:

$$\begin{aligned} ripple\_rate \sim & recall\_indicator + clustering\_indicator + \\ & (recall\_indicator + clustering\_indicator|participant) + \\ & (recall\_indicator + clustering\_indicator|participant : session) \end{aligned} \quad (4)$$

760 where *recall\_indicator* and *clustering\_indicator* are the same as in **Eq. 2** and **Eq. 3**, respectively.  
761 Random intercepts and slopes for sessions nested in participants follows the same structure as **Eq. 2**.  
762 The null hypothesis is no difference between clustered and unclustered words after taking into account  
763 recalled vs. not recalled words.

764

We hypothesize that participants that recall more words will show a bigger ripple subsequent clustering effect (SCE), in which words that subsequently are recalled and lead to clustering will have more ripples than words that are subsequently recalled and do not lead to clustering. To test this relationship we use the linear mixed effects model:

$$\begin{aligned} \Delta ripple\_rate \sim & average\_recalls + (average\_recalls|participant) + \\ & (average\_recalls|participant : session) \end{aligned} \quad (5)$$

765 where *average\_recalls* is the average number of recalls per 12-word list for the participant and  
766  $\Delta ripple\_rate$  is the average difference in ripple rate from 0.1 to 1.7 s following word presentation for  
767 subsequently clustered (i.e. adjacent semantic and remote semantic trials) vs. unclustered (i.e. remote  
768 unclustered and dead ends) words. Random intercepts and slopes for sessions nested in participants  
769 follows the same structure as **Eq. 2**. The null hypothesis is that SCE does not relate to memory perfor-  
770 mance.

771

To directly compare the SCE vs. memory interaction between regions, we use the linear mixed effects model:

$$\begin{aligned} \Delta ripple\_rate \sim & average\_recalls * region\_indicator + \\ & (average\_recalls * region\_indicator|participant) + \\ & (average\_recalls * region\_indicator|participant : session) \end{aligned} \quad (6)$$

772

The \* indicates separate coefficients are calculated for each term and the interaction. Random intercepts and slopes for sessions nested in participants follows the same structure as **Eq. 2**. The null hypothesis is no difference in the interaction between the average number of recalls and region (*average\_recalls : region\_in*

775



We also compare the SCE  $\Delta ripple\_rate$  with the amount of clustering at the participant-level using a similar linear mixed-effects model:

$$\Delta ripple\_rate \sim proportion\_clustered + (proportion\_clustered|participant) + (proportion\_clustered|participant : session) \quad (7)$$

776 where *proportion\_clustered* is the combined number of words that lead to adjacent semantic and re-  
777 mote semantic trials divided by the total number of words recalled for each participant. Random in-  
778 tercepts and slopes for sessions nested in participants follows the same structure as **Eq. 2**. The null hy-  
779 pothesis is that SCE does not relate to the amount participants recall words via clustering.

780

To directly compare the SCE vs. clustering interaction between regions, we use the linear mixed effects model:

$$\Delta ripple\_rate \sim proportion\_clustered * region\_indicator + (proportion\_clustered * region\_indicator|participant) + (proportion\_clustered * region\_indicator|participant : session) \quad (8)$$

781 The \* indicates separate coefficients are calculated for each term and the interaction. Random inter-  
782 cepts and slopes for sessions nested in participants follows the same structure as **Eq. 2**. The null hy-  
783 pothesis is no difference in the interaction between the proportion of clustered recalls and region (*proportion\_clustered* :  
784

Next we investigate the hypothesis that a ripple during the first pair of words from a category ( $X_{1-2}$ ) will make it more likely to see reinstatement—and therefore a ripple (3)—during the second pair of words from a category ( $X_{3-4}$ ). As a result, we expect likelier recall of  $X_{3-4}$  if a ripple occurs during  $X_{1-2}$ , and even likelier recall if a ripple occurs during both pairs. To test this hypothesis we use the linear mixed-effect model:

$$recall\_X_{3-4} \sim ripple\_X_{1-2} * ripple\_X_{3-4} + ripple\_other\_words + (ripple\_X_{1-2} * ripple\_X_{3-4} + ripple\_other\_words|participant) + (ripple\_X_{1-2} * ripple\_X_{3-4} + ripple\_other\_words|participant : session) \quad (9)$$

785 where *recall\_X3-4* indicates if a participant recalled a word from  $X_{3-4}$ , *ripple\_X1-2* indicates a rip-  
786 ple occurred during  $X_{1-2}$ , *ripple\_X3-4* indicates a ripple occurred during  $X_{3-4}$ , and *ripple\_other\_words*  
787 is the ripple rate for the remaining (eight) words on the list not from that category. The \* indicates  
788 separate coefficients are calculated for each term and the interaction. Random intercepts and slopes  
789 for sessions nested in participants follows the same structure as **Eq. 2**. The null hypotheses are that  
790 1) recall of a word from  $X_{3-4}$  is not more likely if a ripple occurs during  $X_{1-2}$  (the coefficient for  
791 *ripple\_X1-2*) and 2) recall of a word from  $X_{3-4}$  is not more likely if a ripple occurs during both  $X_{1-2}$   
792 and  $X_{3-4}$  (the coefficient for the interaction *ripple\_X1-2 : ripple\_X3-4*).

793

794 As a control, we use the same model as above to predict  $X_{1-2}$  recalls (instead of  $X_{3-4}$  recalls). The  
795 null hypothesis is recall of words from  $X_{1-2}$  is not more likely if a ripple occurs during both  $X_{1-2}$  and  
796  $X_{3-4}$ .

797

Finally, we test the hypothesis that a ripple during encoding of a word combined with a ripple in the PRE window during its subsequent recall will increase the likelihood that word leads to clustering. To test this hypothesis we use the linear mixed effects model:

$$\begin{aligned} \text{clustering\_indicator} \sim & \text{encoding\_ripple} * \text{retrieval\_ripple} + \\ & (\text{encoding\_ripple} * \text{retrieval\_ripple} | \text{participant}) + \\ & (\text{encoding\_ripple} * \text{retrieval\_ripple} | \text{participant} : \text{session}) \end{aligned} \quad (10)$$

798 where *clustering\_indicator* is 1 if a recalled word leads to clustering and 0 if not (i.e. remote unclus-  
799 tered or dead end), *encoding\_ripple* is an indicator variable with the value 1 if  $\geq 1$  ripple occurred in  
800 the window from 0.1 to 1.7 s after word presentation, and *retrieval\_ripple* is an indicator variable with  
801 the value 1 if  $\geq 1$  ripple occurred in the window from -1.1 to -0.1 s aligned to vocalization of the word  
802 during retrieval. The \* indicates separate coefficients are calculated for each term and the interaction.  
803 Random intercepts and slopes for sessions nested in participants follows the same structure as **Eq. 2**.  
804 The null hypothesis is no increase in clustering when a ripple occurs during encoding of a word and  
805 prior to its subsequent recall.
